# SleePyPhases: A Workflow Framework for Sleep Data Harmonization, Analysis and Machine Learning

Franz Ehrlich<sup>1,2,✉</sup>, Sara Bäcker<sup>1</sup>, Martin Schmidt<sup>2</sup>, Hagen Malberg<sup>2</sup>, Martin Sedlmayr<sup>1</sup>,  
and Miriam Goldammer<sup>1</sup>

<sup>1</sup> Institute for Medical Informatics and Biometry, Faculty of Medicine and University  
Hospital Carl Gustav Carus, TUD Dresden University of Technology

<sup>2</sup> Institute of Biomedical Engineering, TUD Dresden University of Technology

✉ Correspondence: [Franz Ehrlich <franz.ehrlich@tu-dresden.de>](mailto:franz.ehrlich@tu-dresden.de)

## 1. Abstract

Data-driven sleep research relies on polysomnography data from various public repositories and vendor systems. Yet the lack of standardized access methods creates substantial barriers to multi-dataset research, method reuse, and reproducibility. We present SleePyPhases, an open-source Python framework providing unified access to multiple sleep data repositories. It offers integrated data harmonization, configuration-based preprocessing, and the development of machine learning pipelines. The framework unifies channel naming, annotation semantics, and data formats across several public repositories (including SHHS, MESA, MrOS, PhysioNet, and SleepEDF) and commercial vendor formats (Philips Alice and Somnomedics Domino). We validated the framework by reproducing five published sleep analysis studies covering diverse datasets, sleep scoring tasks (sleep staging, arousal, leg movement, respiratory event

23 detection), preprocessing methods (signal preprocessing and spectrograms), machine  
24 learning methods (supervised and unsupervised learning), and model architectures  
25 (convolutional, recurrent, and transformer networks). Four reproductions achieved near-  
26 identical results, confirming data fidelity and methodological flexibility. SleePyPhases is  
27 open-source and provides a foundation for reproducible sleep research, enabling  
28 researchers to focus on scientific questions rather than data infrastructure.

## 29 2. Introduction

30 Sleep is a fundamental aspect of human health and well-being ([Mukherjee et al. 2015](#))  
31 and plays a crucial role in various physiological and cognitive processes. Understanding  
32 the complexities of sleep has therefore been the focus of numerous research studies,  
33 providing valuable insights into the prevention, diagnosis and treatment of sleep  
34 disorders. Polysomnography (PSG), performed in accredited sleep laboratories, is the  
35 gold standard for assessing sleep quality. These overnight recordings contain at least  
36 nine different types of biosignals, along with manual annotations and metadata ([Berry et](#)  
37 [al. 2012](#)). Biosignals are measured using multiple derivations and are often  
38 supplemented by additional signals, such as those from positive airway pressure therapy  
39 devices. Sleep technologists and physicians manually score the full-night PSG, adding  
40 annotations for sleep stages, arousals, respiratory events and leg movements. Sleep  
41 laboratories can choose from numerous software suppliers to record and store PSG  
42 data.

43 However, the lack of standardization in the sleep research field poses significant  
44 challenges for researchers and clinicians alike ([Mazzotti et al. 2022](#); [Zhang et al. 2018](#)).  
45 Due to this absence of standards, manufacturers use proprietary formats for storing

46 sleep data, making it difficult to exchange, analyze, and process data from different  
47 sources. Although the European Data Format (EDF+) ([Kemp and Olivan 2003](#)) provides  
48 a standardized file format for storing biosignals, it lacks semantic meaning in terms of  
49 channel names and annotation labels, which are crucial for consistent interpretation and  
50 analysis across studies. These factors make it difficult to create automated data analysis  
51 pipelines that work across different datasets, vendors, or PSG configurations.

52 To gain a comprehensive understanding of sleep, researchers rely on the analysis of  
53 large cohorts containing sleep-related information, such as polysomnography (PSG)  
54 recordings ([Quan et al. 1997](#); [Chen et al. 2015](#); [Blackwell et al. 2011](#)). These datasets,  
55 often collected from diverse populations and settings, have the potential to reveal  
56 patterns, associations and trends that can significantly advance our knowledge of sleep.  
57 Machine learning and “big data” techniques, which have shown great promise in sleep  
58 research ([Redline and Purcell 2021](#)), require consistent input data, with all channels  
59 having the same sampling rate across recordings. This harmonisation process is  
60 essential for developing robust and generalisable models that can leverage the full  
61 potential of large-scale sleep datasets.

62 The lack of standardization in sleep research has been widely recognized as a  
63 significant barrier to cross-study analysis and reproducibility ([Zhang et al. 2018](#);  
64 [Arnardottir et al. 2016](#)). There exist only few publications that address these problems  
65 and are therefore a relevant comparison to this work.

66 Zhang et al. highlighted the critical need for data sharing and reuse of data to accelerate  
67 sleep research. Therefore they created a space to store digital objects and made them  
68 **Findable, Accessible, Interoperable and Reusable** (FAIR principle ([Wilkinson et al.](#)

69 2016)). The space includes multiple sleep datasets emphasising the EDF format and  
70 standard XML files for annotations and CSV for metadata. Their main goal of Zhang et  
71 al. (2018) was to create a comprehensive set of harmonized data. However, this does  
72 not include a harmonized method for loading and processing the data.

73 Sveinbjarnarson et al. (Sveinbjarnarson et al. 2023) described the “Sleep Revolution  
74 Platform,” proposing a high-level design for dynamic data source pipelines and digital  
75 platform architecture for complex sleep data. Their work emphasizes the theoretical  
76 framework for transforming heterogeneous datasets into homogeneous databases and  
77 discusses database management considerations. However, unlike the present work,  
78 their contribution remains primarily at the design level without a complete  
79 implementation or extensive validation across diverse machine learning approaches.

80 Recent efforts to address the reproducibility of sleep-related research include  
81 SLEEPYLAND (Fiorillo et al. 2024), which provides a comprehensive framework for  
82 sleep data analysis, emphasising the fair training of sleep staging models locally. The  
83 project offers a graphical user interface (GUI) for selecting various state-of-the-art  
84 algorithms. These models can be executed locally using multiple publicly available  
85 datasets or local EDF data. The GUI also offers a range of visualisation methods for  
86 evaluating the algorithms. The aim of SLEEPYLAND is to fairly retrain existing methods.

87 One recent study has specifically addressed the challenges of multi-dataset sleep  
88 research by using standardized data pipelines. Strøm et al. (Strøm et al. 2024)  
89 developed the “Common Sleep Data Pipeline” (CSDP), an open-source solution for  
90 standardizing heterogeneous sleep datasets into a unified format using HDF5 storage.  
91 Their approach demonstrates processing 21 datasets, with validation through U-Sleep

92 and L-SeqSleepNet models. While the CSDP primarily focuses on sleep staging, data  
93 harmonisation, and storage efficiency, it lacks other sleep scoring tasks, extensive  
94 preprocessing, machine learning workflow integration, and customizable vendor format  
95 support.

96 There are many toolboxes and packages for sleep analysis in Python, including a U-  
97 Sleep implementation that supports multiple datasets ([Perslev et al. 2021](#)). However, as  
98 these prioritise reproducible analysis steps over an overarching framework, they are not  
99 relevant to this work.

100 With a focus on enabling reproducible, multi-dataset machine learning research, we  
101 have developed the workflow framework *SleePyPhases* in Python. This modular,  
102 extensible framework provides:

- 103 • **Unified data access** from proprietary formats and publicly available datasets  
104 through standardized interfaces
- 105 • **Semantic harmonization** of channel names, annotation labels, and metadata  
106 across diverse sources
- 107 • **Configuration-driven workflows** that ensure reproducibility and minimal data  
108 generation
- 109 • **Extensible plugin architecture** enabling community contributions for new data  
110 sources
- 111 • **FAIR-compliant** supporting findability, accessibility, interoperability, and  
112 reusability

113 To validate that the workflow framework, we reproduced five published sleep analysis  
114 from various domains of sleep analysis and reproduced their results. The reproductions  
115 span a wide range of:

- 116 • Publicly available datasets including SHHS, MESA, MrOS, PhysioNet and  
117 SleepEDF
- 118 • Single and multi-task sleep analysis including sleep staging, arousal detection,  
119 sleep disordered breathing detection and leg movement detection
- 120 • Different labeling strategies such as default event windows and segmentation
- 121 • Different preprocessing requirements such as signal-based and spectrogram-  
122 based approaches
- 123 • Different model architectures including CNN, LSTM and Transformer
- 124 • Different training strategies such as supervised and unsupervised learning

125 The aim of *SleePyPhases* is to provide a standardised workflow for accessing sleep  
126 data that is independent of repository, vendor or study design. The validation cases  
127 presented demonstrate the flexibility of the applied methods while reducing the technical  
128 overheads of multi-dataset research.

### 129 3. Materials and Methods

130 The *SleePyPhases* workflow framework was implemented in Python to leverage the  
131 ecosystem of scientific computing tools. The framework evolved through iterative  
132 application to our research projects ([Goldammer et al. 2022](#); [Ehrlich et al. 2022, 2024](#)).  
133 The modular architecture emerged as a necessity to accommodate the inherent  
134 heterogeneity of sleep data across repositories, vendors, and research methodologies.

135 This section describes the framework’s design principles, harmonization approach, and  
136 validation through reproduction of five diverse published studies.

### 137 3.1 Framework Requirements and Design Objectives

138 The development of machine learning pipelines for sleep data analysis presents several  
139 fundamental challenges that must be addressed to enable reproducible and scalable  
140 research. Based on the literature ([Cheng et al. 2024](#)), our previous development process  
141 and experience with diverse sleep analysis approaches, we identified the following core  
142 requirements for a comprehensive sleep analysis framework:

143 **Data Harmonization:** The framework must provide unified access to a variety of sleep  
144 data sources, including both proprietary vendor formats and publicly available datasets.  
145 This requires reconciling heterogeneity across three dimensions: syntax (technical  
146 formats like XML or JSON), structure (conceptual schemas, such as transforming signal-  
147 based annotations into event-based data), and semantics (the intended meaning of  
148 variables) ([Cheng et al. 2024](#)). This process is centered on the definition of a  
149 DataSchema ([Cheng et al. 2024](#)). For sleep research this means channel naming  
150 conventions, annotation semantics and PSG parameters. Additionally, for machine  
151 learning tasks, a consistent temporal resolution is required.

152 **Configurable Preprocessing:** Preprocessing pipelines must be fully configurable, with  
153 efficient storage mechanisms that eliminate redundant computations. The system should  
154 support signal-type-specific preprocessing steps. This aligns with the requirement for  
155 normalization and standardization of data methodologies to ensure that different  
156 datasets are inferentially equivalent before being pooled for machine learning ([Cheng et](#)  
157 [al. 2024](#)).

158 **Flexible Data Manipulation:** Different machine learning algorithms require different  
159 input representations. The framework must provide extensible mechanisms for  
160 transforming preprocessed data for each training step.

161 **Integrated Training Pipeline:** The framework should integrate data loading, model  
162 training, and evaluation within a unified environment. This includes support for multiple  
163 deep learning frameworks, custom training strategies, and comprehensive evaluation  
164 metrics for both segment-wise and event-wise analysis.

165 **Configuration-Data Synchronization:** Every methodological decision must be  
166 transparently documented ([Cheng et al. 2024](#)). Method decisions should be documented  
167 using the configuration. To prevent inconsistencies and redundant computations, the  
168 framework should maintain explicit connections between configurations and generated  
169 artifacts. When configuration parameters change, the system should automatically  
170 recognize which artifacts need regeneration.

171 **Modular Architecture Through Plugins:** To address the logistical challenge of  
172 disparate stakeholders (different vendors, datasets, and research protocols) and  
173 evolving technology ([Cheng et al. 2024](#)) the framework must employ a modular plugin-  
174 based architecture. This enables parallel development of dataset-specific components  
175 and research methods while preserving reproducibility through versioned plugins that  
176 can be independently developed, tested, and shared across research groups.

177 To address these requirements, we developed *SleePyPhases* as a modular, extensible  
178 Python framework built upon three main components: the core pyPhases system for  
179 configuration-driven project management, the SleepHarmonizer plugin for PSG data  
180 handling, and the pyPhasesML plugin for machine learning operations. This architecture

181 enables researchers to focus on algorithmic innovation rather than infrastructure  
182 concerns while ensuring that complex pipelines remain reproducible. By design, the  
183 framework adheres to FAIR principles ([Wilkinson et al. 2016](#)): it is **Findable** through  
184 public repositories, **Accessible** via open-source licensing, **Interoperable** across diverse  
185 PSG vendors, datasets and formats, and **Reusable** through its modular, configuration-  
186 driven architecture.

### 187 3.2 Framework Validation Through Study Reproduction

188 To validate that the harmonized data access workflow provides functionally equivalent  
189 data to direct repository access, we selected five published sleep analysis studies for  
190 reproduction. These studies were specifically chosen to comprehensively test the  
191 framework’s capability to handle diverse data access requirements and methodological  
192 approaches. Successful reproduction with near-identical results serves as validation  
193 that: (1) the harmonization workflow correctly loads and processes data from different  
194 repositories, (2) the standardized access layer does not introduce artifacts or degrade  
195 data quality, (3) the configuration-driven approach maintains reproducibility, and (4)  
196 previously closed-source methods can be made open and reproducible. Each  
197 reproduction required implementing data access through our framework rather than  
198 original custom code, directly testing whether standardized access can replace  
199 repository-specific implementations. An overview of the validation studies is given in  
200 [Table 1](#).

201 A dense recurrent convolutional neural network (DRCNN) is used in the approach by  
202 ([Howe-Patterson, Pourbabaee, and Benard 2018](#)), which won the George B. Moody  
203 PhysioNet Challenges 2018 “You Snooze You Win” ([Ghassemi et al. 2018](#)) for detecting

204 non-apnea arousals. Their approach includes a multi-task learning approach that  
205 combines binary classification for arousal, sleep and apnea events. The binary output is  
206 then remapped to only relevant states. The training pipeline, including the trained  
207 models, is available as open source.

208 The *SleepTransformer* implementation from (Phan et al. 2022) aims to create a more  
209 interpretable five-class sleep stage classification using a transformer-based architecture.  
210 Phan et al. calculate spectrogram images for the EEG, EOG and EMG in the SleepEDF  
211 and SHHS dataset. To reach better results on the much smaller SleepEDF dataset a  
212 pre-trained model trained on the SHHS data is used to improve the results. The open-  
213 source repository includes MATLAB code for preprocessing and evaluation purposes.  
214 Meanwhile, the training code is provided in Python.

215 *SleepPPG-Net* was introduced by Kotzen et al. (2022), a deep learning algorithm for  
216 four-class sleep staging directly from the continuous raw PPG time series. It utilizes a  
217 residual convolutional network for feature extraction and a temporal convolutional  
218 network for contextual information. It was developed and evaluated using the SHHS,  
219 MESA, and CFS public sleep databases. The different datasets are used for pretrained  
220 models using the electrocardiogram (ECG), inter-dataset validation and fine-tuning the  
221 model on a specific dataset.

222 The approach from (Zahid et al. 2023) proposes a CNN/RNN based split-stream  
223 architecture designed for multi sleep event detection (*MSED*) including arousals, leg  
224 movements, and binary sleep-disordered breathing events. The model was trained and  
225 tested on the MrOS Sleep Study, using various PSG channels. Compared to other  
226 approaches, default event windows are used. Instead of using fixed segmentation, they

227 generate default events with different window sizes (3, 15, 30 seconds) across the whole  
228 record as target. The training task involves predicting the correct class and location for  
229 each default event window. To handle the class imbalance favoring non-class default  
230 events, negative mining loss was employed. A custom sampling strategy was used to  
231 select segments based on the event probability distribution across a recording to prevent  
232 segments without events being used. For the evaluation only events with at least an  
233 intersection over union (IOU) of 0.5 are compared.

234 *NeuroNet* (Lee et al. 2024) introduces a novel self-supervised learning (SSL) framework  
235 combining contrastive learning and masked prediction tasks with a Mamba-based  
236 temporal context module, all using single-channel EEG. The research uses three  
237 different datasets: SleepEDFX, SHHS, and ISRUC-Sleep (Khalighi et al. 2016). First an  
238 encoder with a representation of an EEG segment was learned using SSL. A total of five  
239 data augmentation methods were used, two of which were randomly selected during  
240 training. The training progress was monitored on a simple sleep staging task using a  
241 principal component analysis on the learned features during the validation. Next a  
242 simple classifier that predicts sleep stages on a single epoch was trained using the  
243 frozen encoder to evaluate the SSL performance. Afterwards a more comprehensive  
244 model was trained, that also included a temporal context of multiple sleep epochs. The  
245 training pipeline is available as open source, without the loading of the data and data  
246 augmentation.

*Table 1: An overview of the selected research papers for framework validation. The papers cover a wide range of methodologies and datasets. SDB: Sleep Disordered Breathing CFS: Cleveland Family Study Visit-5 v1, SHHS: Sleep Heart Health Study, MESA: Multi-Ethnic Study of Atherosclerosis, MrOS: MrOS Sleep Study*

| Ref                      | Special                                  | Model           | Datasets                                                              | Sleep Component                                        |
|--------------------------|------------------------------------------|-----------------|-----------------------------------------------------------------------|--------------------------------------------------------|
| Pourbabaee et al. (2019) | multi-task                               | CNN/<br>LSTM    | PhysioNet<br>2018                                                     | binary arousal<br><br>binary apnea<br><br>binary sleep |
| Phan et al. (2022)       | multiple spectrograms,<br>early stopping | Transf<br>ormer | Sleep-EDF<br><br>SHHS                                                 | sleep stages<br>(5 classes)                            |
| Kotzen et al. (2022)     | PPG based                                | CNN             | MESA<br><br>CFS                                                       | sleep stages<br>(4 classes)                            |
| Lee et al. (2024)        | unsupervised learning<br><br>fine-tuning | Transf<br>ormer | SleepEDF<br><br>SHHS<br><br>Sleep-EDF<br>→ SHHS<br>SHHS →<br>SleepEDF | sleep stages<br>(5 classes)                            |
| Zahid et al. (2023)      | default event windows,<br>multi-task     | CNN             | MrOS                                                                  | binary arousal                                         |

binary leg

movement

binary SDB

## 247 3.3 Framework Implementation

### 248 3.3.1 Core Architecture: pyPhases

249 The core of the SleepPyPhases framework is pyPhases, a framework for creating and  
250 executing custom *Projects*. Its key feature is synchronizing generated data  
251 (e.g. preprocessed data and trained models) with the configuration. A *Project* is defined  
252 by three components:

253 *Phases*: These are used to execute code and generate data. Each phase can be  
254 executed separately. For a machine learning project, typical phases include data  
255 preprocessing, model training and evaluation.

256 *Configuration*: The Configuration defines the execution. Typical configuration for a  
257 machine learning task includes a target sampling rate, preprocessing steps, model  
258 hyperparameters and training parameters.

259 *Data*: Data is generated by the *Phases* and may depend on the *Configuration*. Data that  
260 depends on the configuration is stored with a specific configuration identification. For  
261 example preprocessed data is generated by the preprocessing phase and depends on  
262 the target sampling rate defined in the configuration.

263 These three components are defined in a `project.yaml` file, which provides a human  
264 readable project configuration. A basic example of project configuration and python code  
265 can be found in the appendix.

266 Another integral component of pyPhases is data storage. The storage is handled by an  
267 *Exporter*, which can store and load data. The most basic type of storage is a pickle-  
268 based *Exporter*, which handles the loading and storing of data directly to the filesystem.

269 With this construct of pyPhases, it is possible to generate data based on the *Project*  
270 state: When data depends on the configuration, it is stored with a specific configuration  
271 identification. When data was previously generated with the same configuration it does  
272 not need to be regenerated and can be directly loaded from the storage. [Figure 1](#) shows  
273 an example of how a *Project* instance handles a data request.

Figure 1: An example of how the project instance handles a data request. The project checks if the data exists in memory or file-system and if not, it generates the data using the defined phases and saves the data using the defined exporter and stores it in memory. The data can be loaded from memory or file-system if it exists for the specific configuration.

274 Each *Project* comprises its own *Phases*, *Configuration*, *Data* and *Exporter*. The  
 275 *pyPhases* framework also provides a plugin system, which helps to compose and extend  
 276 different functionality. Each plugin is represented by a Python package in the *Python*  
 277 *Package Index* and can be developed separately.

### 278 3.3.2 SleePyPhases Architecture

279 The *SleePyPhases* architecture is specifically designed to create pipelines for automatic  
 280 sleep analysis with machine learning. The overall architecture is shown in Figure 2. The  
 281 complete training and evaluation workflow of a ML algorithm is shown in Figure 3, which  
 282 illustrates how the *Phases* and modules interact to generate temporary and persistent  
 283 data.

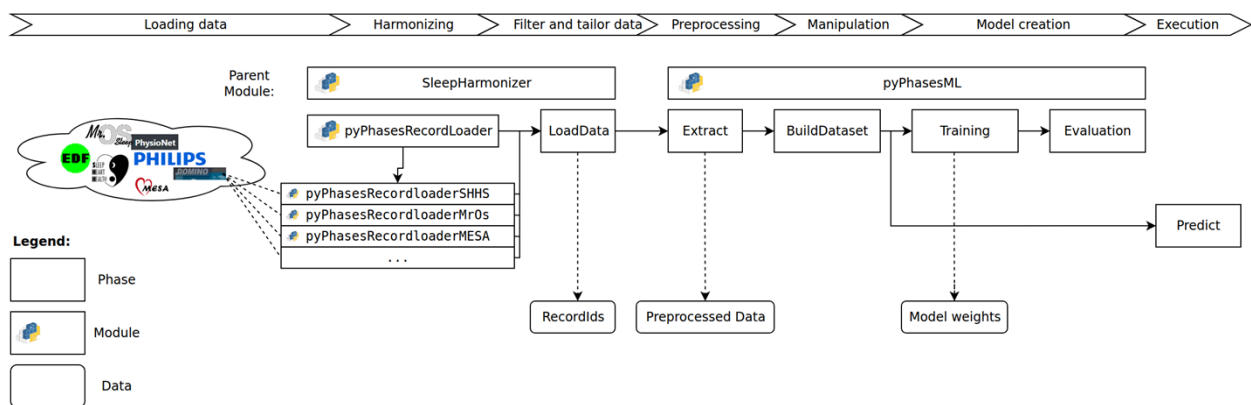

Figure 2: SleePyPhases Architecture

284

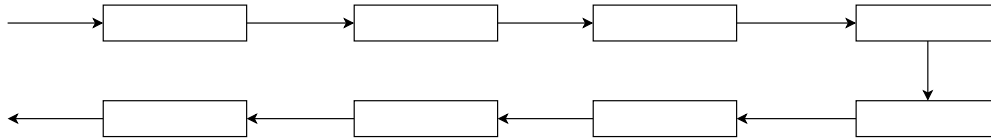

Figure 3: A sequential order for a machine learning model evaluation, where the Phases and modules produce different types of temporary and persistent (shown in bold) data.

285 The base functionality of *pyPhases* is extended by the plugins *pyPhasesML* and  
 286 *SleepHarmonizer*. The *SleepHarmonizer* provides a standard interface for working with  
 287 recordings using the *pyPhasesRecordloader* module. This module forms the basis for  
 288 specific record loaders that support particular file types, datasets  
 289 (e.g. *pyPhasesRecordloaderSHHS*) or PSG vendors (e.g. *pyPhasesRecordloaderDomino*).  
 290 These specific record loaders provide an interface that harmonizes different biosignals,  
 291 manual annotations and record metadata.

292 The *pyPhasesML* plugin provides an interface to handle specific preprocessing steps,  
 293 data manipulation and methods to train machine learning models. It handles the  
 294 machine learning pipeline: extracting data, efficiently loading data, manipulating data  
 295 and training models. At the moment, *pyTorch* and *tensorflow* models are supported.

296 *SleePyPhases*, *pyPhases*, *SleepHarmonizer*, *pyPhasesML*, all specific record loaders,  
 297 packages and the code to reproduce the experiments are made publicly available under  
 298 the MIT License on the *Python Package Index* and *GitLab*, see [https://gitlab.com/sleep-](https://gitlab.com/sleep-is-all-you-need/sleepyphases)  
 299 [is-all-you-need/sleepyphases](https://gitlab.com/sleep-is-all-you-need/sleepyphases), <https://gitlab.com/sleep-is-all-you-need/pyphases> and  
 300 <https://gitlab.com/sleep-is-all-you-need/reproduce/>. This public availability ensures the  
 301 framework follows FAIR principles.

### 302 3.3.3 Data Acquisition

303 Data acquisition is provided by the `pyPhasesRecordloader` module. Each specific  
304 *RecordLoader* loads PSG data using three methods:

- 305 • `getSignals` returns a *RecordSignal* which is a composition of signals including  
306 information such as the sampling rate and the signal itself as NumPy array
- 307 • `getEventList` returns a list of events and annotations with start times and  
308 durations
- 309 • `getMetaData` returns a key-value dictionary of record- and channel-specific  
310 metadata

311 Several predefined recordloaders are available to load data from different datasets  
312 including Sleep Heart Health Study (SHHS) ([Quan et al. 1997](#)), Multi-Ethnic Study of  
313 Atherosclerosis (MESA) ([Chen et al. 2015](#)), MrOS Sleep Study (MrOS) ([Blackwell et al.](#)  
314 [2011](#)), George B. Moody PhysioNet Challenges 2018 (PhysioNet) ([Ghassemi et al.](#)  
315 [2018](#)), SleepEDF Database Expanded (SleepEDF) ([Kemp et al. 2000](#)), Human Sleep  
316 Project (HSP) ([Westover et al. 2023](#)) and two different vendors including Philips Alice®  
317 and Somnomedics Domino®. A loader can be activated by setting the configuration  
318 value `useLoader` to the name of the loader (e.g. `useLoader: shhs`). For a predefined  
319 dataset recordloader, only the path is needed (e.g. `shhs-path: /dataset/shhs`).

320 To include custom setups or new datasets, the file structure needs to be defined to  
321 extract the recordID patterns. Additionally, the channel configuration is required in the  
322 configuration. All loader configurations are stored in the main parent loader  
323 configuration. A configuration to handle the shhs dataset which is included in the  
324 `pyPhasesRecordloaderSHHS` module is shown in [Listing 1](#).

*Listing 1: Example Configuration to handle SHHS dataset*

```
loader:
  shhs:
    dataBase: SHHS
    dataBaseVersion: 1.0.0
    dataIsFinal: True # will not be changed in the future
    dataset:
      loaderName: RecordLoaderSHHS
      dataHandler:
        extensions: [.edf, -nsrr.xml]
        idPattern: .*/(.*)\.edf
        filePattern: "*.edf"

sourceChannels:
  - name: SaO2
    type: sao2
  - name: H.R.
    type: hr
  - name: EEG # EEG C3-A2
    type: eeg
  # ...
```

325 The data can be loaded at any phase using the RecordLoader Singleton and the  
326 loadRecord method as shown in Listing 2. This method returns a RecordSignal, which  
327 contains metadata and all signals.

*Listing 2: Loading an EEG from a specific SHHS-record using the RecordLoader Singleton*

```
from pyPhasesRecordLoader import RecordLoader

recordLoader = RecordLoader.get()
recordSignal, events = recordLoader.loadRecord("shhs1-0001")

eegSignal = recordSignal.getSignalByName("EEG1")
print(eegSignal.frequency) # shows the sampling rate
print(eegSignal.signal.shape) # shows the shape of the numpy signal
```

### 328 3.3.4 Filtering and splitting the data

329 The data can be filtered using the dataVersion configuration. This allows records to be  
330 specified by ID and filtered by record or channel metadata. Filtering is done using the

331 metadata which is a pandas dataframe with all recordIds and given metadata. A  
332 filterQuery filters the records by the given query. An example to filter all SHHS records  
333 from the first part of the study with an Apnea-Hypopnea-Index greater than 15 is shown  
334 in [Listing 3](#). Additional splits can be defined using the split configuration, to specify  
335 training, validation and test splits. These splits can be explicit or be relative by  
336 defining a fold or with values from zero to one for validationSplit and testSplit.

*Listing 3: Filtering SHHS1 records with an apnea-hypopnea index (AHI) greater than 15. The records are shuffled using the seed 2025 and split into a holdout testset and four training-validation folds.*

```
dataversion:  
  version: shhs1-15  
  filterQuery: recordId.str.startswith("shhs1-") and ahi > 15  
  seed: 2025  
  folds: 4  
  split:  
    test: "0:1000"  
    trainval: "1000:2056"
```

337 A list of records can be loaded within a *Phase* using python  
338 self.getData('allRecordIds', list) and separate splits by using the  
339 dataversionmanager as shown in [Listing 4](#).

*Listing 4: Loading all test record IDs using the DataVersionManager*

```
from pyPhasesML import DataversionManager  
  
dm = self.getData("dataversionmanager", DataversionManager)  
testRecordIds = dm.getRecordsForSplit("test")
```

### 340 3.3.5 Data Preprocessing

341 The data preprocessing is done using the preprocessing and labelChannels  
342 configuration. This allows to define which label channels and target channels should be  
343 used. The preprocessing includes a target frequency for signals and labels, manipulation

344 of the whole record and events (*PreManipulation* using the config *manipulationSteps*)  
345 and preprocessing steps per type (*stepsPerType*). Additionally, the configuration  
346 *featureChannels* allows to add additional channels calculated from the *RecordSignal*,  
347 that can be used as target channels. The preprocessed data is stored in a *NumPy*  
348 memory map, which allows efficient data loading. An example on loading a single record  
349 can be found in [Listing 7](#). How to resample and standardize a photoplethysmography  
350 (PPG) signal is shown in [Listing 5](#). As there are multiple ways to preprocess the data,  
351 the toolbox provides a flexible configuration system that allows to define custom  
352 manipulation and preprocessing steps as shown in [Listing 6](#).

*Listing 5: Preprocessing configuration to resample PPG signals to 64Hz and standardize them.*

```
labelChannels:  
- SleepStagesAASM  
- SleepArousals  
- SleepApnea  
- SleepLegMovements  
  
preprocessing:  
  targetFrequency: 64  
  labelFrequency: 64  
  
manipulationSteps: []  
stepsPerType:  
  ppg: [filter, resample, clip, standardize]  
  
featureChannels: []  
targetChannels:  
- [Pleth]
```

353

*Listing 6: Custom preprocessing step to standardize a signal*

```
from pyPhasesRecordloader import RecordSignal, Signal  
from SleepPyPhases import SignalPreprocessing as
```

```
pyPhaseSignalPreprocessing
```

```
class SignalPreprocessing(pyPhaseSignalPreprocessing):
    def standardize(self, signal: Signal, recordSignal:
RecordSignal):

        mean_val = np.mean(signal.signal)
        std_val = np.std(signal.signal)
        signal.signal = (signal.signal - mean_val) / std_val

    # ...
```

354

*Listing 7: Loading the first record of an extracted dataset*

```
import numpy as np

dataExporterSignals = self.project.getData("data-processed",
np.memmap)

# get the first Record
recordX, recordY = dataExporterSignals[0]
```

### 355 3.3.6 Data Manipulation

356 Data manipulation is the step from loading the optimized data (preprocessing) and  
357 augmenting or manipulating it before being processed by the algorithm. The  
358 manipulation phase transforms the preprocessed data into machine learning model  
359 input. A typical example of manipulation is data augmentation to generate better training  
360 data, but also tensor transformation to generate the suitable input shape. The  
361 manipulation is done using several configuration points:

- 362 • `segmentManipulation`: executed on a single segment of a signal or complete  
363 recording (depending on the `recordWise` configuration)
- 364 • `batchManipulation`: executed on a batch of segments of a signal, before it is  
365 passed to the machine learning algorithm.

- 366       • manipulationAfterPredict: executed on the predictions of the machine learning  
367       algorithm, before they are returned to the user.

*Listing 8: Example configuration for manipulation steps on segments, batches and predictions.*

```
recordWise: True
segmentManipulation:
- name: toLightDeepSleep # [Wake, R, N1, N2, N3] -> [Wake, R,
Light, Deep]
  channel: 0

batchManipulation:
- name: shuffleBatch

manipulationAfterPredict:
- name: deleteIgnored
```

- 368   Similar to the signal preprocessing, the manipulation configuration allows to define  
369   custom manipulation steps (*DataManipulation*) as shown in [Listing 8](#), and their  
370   implementation in [Listing 9](#).

*Listing 9: Custom manipulation step to convert N1, N2 and N3 to light and deep Sleep, shuffle the batch, and ignore all undefined annotations after prediction.*

```
from SleepyPhases import DataManipulation as SPPDataManipulation

class DataManipulation(SPPDataManipulation):
    def toLightDeepSleep(self, X, Y, channel=0):
        # [Wake, R, N1, N2, N3] -> [Wake, R, Light, Deep]
        Y[:, :, channel][Y[:, :, channel] == 3] = 2
        Y[:, :, channel][Y[:, :, channel] == 4] = 3

        return X, Y

    def shuffleBatch(self, X, Y):
        idx = np.random.permutation(X.shape[0])
        return X[idx], Y[idx]

    def deleteIgnored(self, prediction, truth):
        mask = truth != -1
        return prediction[mask], truth[mask]
```

### 371 3.3.7 Evaluation and Reporting

372 The evaluation is divided into two parts: a segment-wise evaluation and an event-wise  
373 evaluation. The segment-wise evaluation scores the evaluation metrics on the test set  
374 segments defined by the `preprocessing.targetFrequency` configuration. The event-wise  
375 evaluation combines consecutive segments with the same label into a single event.  
376 Depending on an overlap, the confusion matrix can then be calculated. For event  
377 evaluation, threshold optimization can be performed to determine the optimal threshold  
378 for the given evaluation metric on the validation set.

379 The event evaluation is stored with performance metrics and calculated PSG  
380 parameters for each recording in a comma separated values (CSV) file, and a summary  
381 of the evaluation is stored in a `results.yml` file. The [Listing 10](#) shows a configuration  
382 that uses different metrics for sleep scoring and calculates PSG parameters on a record-  
383 by-record basis.

*Listing 10: Example configuration for using different evaluation metrics on different scoring components and for calculating clinical metrics.*

```
eval:  
  batchSize: 1  
  metrics:  
    - [f1, kappa] # sleep  
    - [auprc, f1] # arousal  
    - [f1, kappa] # resp. events  
    - [auprc, f1] # periodic leg movements  
  clinicalMetrics:  
    - tst  
    - waso  
    - ahi  
    - arousalIndex  
    - indexPLMS
```

## 384 4. Results

### 385 4.1 Framework Validation Through Study Reproduction

386 All five selected studies were successfully reproduced using the harmonized data  
387 access workflow, demonstrating that standardized repository access can replace custom  
388 data handling implementations. Each reproduction validates specific aspects of the  
389 framework's data harmonization capabilities while confirming that the framework  
390 maintains data fidelity across diverse access patterns.

391 The implementation of the DRCNN by (Pourbabaee et al. 2019) with *SleePyPhases*  
392 (SPP-DRCNN) validates the framework's ability to access challenge-based datasets  
393 with specific formatting requirements. Accessing PhysioNet 2018 data through  
394 *pyPhasesRecordloaderPhysionet* required harmonizing 12 different PSG channel types  
395 and complex annotation schemas. The reproduction demonstrates that standardized  
396 data loading produces identical results to custom implementations, validating that the  
397 harmonization layer preserves data integrity for multi-channel recordings with diverse  
398 sampling rates and challenge-specific annotation formats.

399 The SleepTransformer reproduction (Phan et al. 2022) (SPP-SleepTransformer)  
400 validates the framework's multi-repository access capabilities. Successfully accessing  
401 both SHHS and SleepEDF through their respective loaders  
402 (*pyPhasesRecordloaderSHHS*, *pyPhasesRecordloaderSleepEDF*) demonstrates that  
403 the framework provides consistent data access across repositories with different  
404 organizational structures and metadata formats. The near-identical reproduction results  
405 confirm that standardized access produces functionally equivalent data regardless of the

406 underlying repository structure, enabling seamless multi-dataset studies without custom  
407 data handling code.

408 The SleepPPG reproduction ([Kotzen et al. 2022](#)) (SPP-SleepPPG-Net) validates the  
409 framework's capability for signal-specific access and three-way repository  
410 harmonization. Integrating data from MESA, SHHS, and CFS through unified interfaces  
411 (*pyPhasesRecordloaderMESA*, *pyPhasesRecordloaderSHHS*,  
412 *pyPhasesRecordloaderCFS*) demonstrates that the framework enables direct  
413 comparison and inter-dataset validation studies. The reproduction confirms that PPG-  
414 specific preprocessing pipelines can be consistently applied across repositories,  
415 validating the framework's ability to handle specialized signal types and cross-dataset  
416 research designs.

417 The MSED reproduction ([Zahid et al. 2023](#)) (SPP-MSED) validates the framework's  
418 extensibility for complex event-based data access patterns. Accessing MrOS data with  
419 custom segmentation strategies demonstrates that the framework accommodates non-  
420 standard data access requirements while maintaining standardization. The successful  
421 reproduction confirms that even complex, study-specific data extraction patterns can be  
422 implemented within the standardized workflow, validating its flexibility for diverse  
423 research methodologies.

424 The NeuroNet reproduction ([Lee et al. 2024](#)) (SPP-NeuroNet) validates the framework's  
425 support for multi-stage, multi-dataset access patterns required by self-supervised  
426 learning approaches. Accessing SleepEDFX and SHHS data through separate training  
427 phases demonstrates the framework's ability to manage complex data dependencies  
428 and cross-dataset transfer learning scenarios. While this reproduction encountered

429 challenges due to incomplete augmentation specifications in the original publication, the  
430 partial success still validates that the framework correctly accesses and harmonizes  
431 data across multiple repositories for advanced training strategies.

## 432 4.2 Quantitative Validation of Data Access Fidelity

433 The reproduction results provide quantitative validation that the harmonized data access  
434 workflow produces functionally equivalent data to original implementations. Near-  
435 identical performance metrics confirm that standardized repository access preserves  
436 data integrity and does not introduce artifacts or systematic errors.

437 The successful reproduction of all five studies using the *SleePyPhases* framework  
438 validates its capability to provide reliable, standardized access to diverse sleep data  
439 repositories. The reproduction results, summarized in [Table 2](#), demonstrate data access  
440 fidelity across multiple repositories and methodological approaches.

441 Four of the five reproductions produced results that closely matched (less than 5%  
442 deviation) those in the original publications. This confirms that: (1) the harmonized data  
443 access workflow correctly loads data from repositories, (2) the original methods function  
444 correctly with standardized data access, (3) the framework-based implementations now  
445 provide open-source alternatives to previously closed methods, and (4) standardized  
446 access enables reproducibility that was previously impossible. Performance differences  
447 relative to original results are reported as percentage changes, with positive values  
448 indicating higher performance and negative values indicating lower performance.  
449 Detailed comparisons are provided in [Table 2](#).

450 Replicating Pourbabaee et al. (2019) demonstrates successful harmonized access to  
451 PhysioNet 2018 data, achieving similar results for arousal detection (+3.6%) and apnea

452 prediction (+3.4%), confirming that standardized data loading preserves multi-task  
453 annotation fidelity. The notably improved binary sleep classification performance  
454 (+17.6%) suggests the framework may actually improve data quality through consistent  
455 preprocessing, though the source of improvement requires further investigation.  
456 Reproducing Phan et al. (2022) validates cross-repository access fidelity with nearly  
457 identical results across all conditions: *SleepEDF* ( $\pm 0.0\%$ ), *SleepEDF* pretrained on  
458 *SHHS* data (-0.9%), and *SHHS* training ( $\pm 0.0\%$ ). This confirms that the framework  
459 provides equivalent data access across repositories with different structures. The Kotzen  
460 et al. (2022) reproduction validates three-way repository harmonization with close results  
461 (-1.0% for *MESA* and -2.2% for *MESA* pretrained on *SHHS*), confirming that  
462 standardized access enables seamless cross-dataset validation studies. Dataset cross-  
463 validation also yielded similar results (+1.2% for CFS trained on *MESA*), validating the  
464 framework’s support for inter-dataset transfer scenarios. The Zahid et al. (2023)  
465 reproduction validates custom event-based access patterns with similar results for  
466 arousal detection (-3.7%) and leg movement detection (+3.5%). The sleep disordered  
467 breathing detection improvement (+7.5%) may reflect enhanced event alignment  
468 through standardized access. The Lee et al. (2024) reproduction showed similar self-  
469 supervised learning performance (-3.0%), though the fine-tuned model (-11.0%)  
470 revealed that incomplete parameter documentation in the original publication limits full  
471 reproducibility—highlighting how the framework enables transparency by exposing such  
472 gaps through open implementation attempts.

*Table 2: Results of reproducing the different approaches from the literature versus implementing them with the SleepPyPhases (SPP) framework. Results with a relative difference of more than 5% are in bold. CFS: Cleveland Family Study Visit-5 v1, SHHS: Sleep Heart Health Study, MESA: Multi-Ethnic Study of Atherosclerosis, MrOS: MrOS*

*Sleep Study*

| Sleep                           |                                |                       |        |          |              |               |
|---------------------------------|--------------------------------|-----------------------|--------|----------|--------------|---------------|
| Approach                        | Component                      | Datasets              | Metric | Reported | SPP          | Difference    |
| Pourbaba<br>ee et al.<br>(2019) | Arousal                        | PhysioNet             | AUPR   | 0.528    | 0.548        | +3.6%         |
|                                 |                                |                       | C      |          |              |               |
|                                 | Apnea/hypopnea                 |                       | AUPR   | 0.760    | 0.787        | +3.4%         |
|                                 | a                              |                       | C      |          |              |               |
|                                 | Binary sleep                   |                       | AUPR   | 0.820    | <b>0.995</b> | <b>+17.6%</b> |
|                                 |                                |                       | C      |          |              |               |
| Phan et<br>al. (2022)           | Sleep stages<br>(W/R/N1/N2/N3) | SleepEDF              | Kappa  | 0.743    | 0.743        | 0.0%          |
|                                 |                                | SleepEDF<br>(PT SHHS) | Kappa  | 0.789    | 0.782        | -0.9%         |
|                                 |                                | SHHS                  | Kappa  | 0.828    | 0.828        | 0.0%          |
| Kotzen et<br>al. (2022)         | Sleep Stages<br>(W/R/L/D)      | MESA                  | Kappa  | 0.74     | 0.733        | -1.0%         |
|                                 |                                | MESA (PT<br>SHHS)     | Kappa  | 0.75     | 0.734        | -2.2%         |
|                                 |                                | MESA -><br>CFS        | Kappa  | 0.67     | 0.678        | +1.2%         |
|                                 |                                | MESA + CFS            | Kappa  | 0.74     | 0.731        | -1.2%         |

|                     |                            | -> CFS                  |    |        |              |               |
|---------------------|----------------------------|-------------------------|----|--------|--------------|---------------|
| Zahid et al. (2023) | Arousal                    | MrOS                    | F1 | 0.704  | 0.679        | -3.7%         |
|                     | Leg Movement               |                         | F1 | 0.628  | 0.651        | +3.5%         |
|                     | Sleep disordered breathing |                         | F1 | 0.652  | <b>0.705</b> | <b>+7.5%</b>  |
| Lee et al. (2024)   | Sleep stages               | SleepEDF (Unsupervised) | F1 | 0.6819 | 0.662        | -3.0%         |
|                     |                            | SleepEDF (Fine tuned)   | F1 | 0.7982 | <b>0.719</b> | <b>-11.0%</b> |

473

474

## 475 5. Discussion

476 The SleepPyPhases workflow framework has been successfully validated across multiple  
 477 databases and methods, supporting a variety of model architectures and preprocessing  
 478 approaches within a unified, configuration-driven environment. Reproducing five different  
 479 sleep analysis algorithms highlights the framework’s capabilities and the challenges of  
 480 creating reproducible machine learning pipelines for sleep research. The capabilities are  
 481 complemented by our previous research, where (Ehrlich et al. 2024) used the Philips

482 Alice® 6 as custom vendor format and (Goldammer et al. 2022) used the TensorFlow  
483 machine learning framework.

484 All selected validation studies were successfully reproduced using standardized data  
485 access, demonstrating the framework’s versatility in handling diverse repository  
486 structures, annotation schemas, and data organization patterns. The framework enables  
487 researchers to focus on scientific questions and methodological development rather than  
488 low-level data infrastructure concerns.

489 The reproduction studies systematically validated the six core framework requirements.

490 **Data Harmonization** was demonstrated through successful standardized access to  
491 multiple repositories with different organizational structures and vendor formats. This  
492 remains an ongoing community effort as new repositories and vendors emerge. While  
493 we did not focus on the internal *DataSchema* (Cheng et al. 2024) in this research, we  
494 provide a function to export the PSG using standardized codings for annotations and  
495 signal representations. **Configurable Preprocessing** was validated through diverse  
496 preprocessing pipelines applied consistently across repositories, from sliding  
497 normalization windows (DRCNN) to spectrogram extraction (SleepTransformer).  
498 Additionally, the framework’s memory-mapped storage system provides efficient access  
499 while maintaining configuration-based provenance. A configuration-based method was  
500 used to define implementations, achieving **Flexible Data Manipulation** ranging from  
501 default event windows (MSED) to complex augmentation strategies (NeuroNet).  
502 Reproduction studies have demonstrated the successful application of multiple analysis  
503 frameworks (e.g. PyTorch and TensorFlow) and training strategies (e.g. supervised and  
504 self-supervised) within the framework. Therefore, the **Integrated Training Pipeline**

505 requirement has been met. The pyPhases component ensured the **Configuration-Data**  
506 **Synchronization**, through explicit configuration-based provenance that connects data  
507 access patterns to results and ensuring experiment reproducibility. Finally, the **Modular**  
508 **Architecture** was validated through the independent development of repository-specific  
509 loaders that can be shared and by different research groups without any need to modify  
510 the core framework code. Therefore, the framework meets all the requirements identified  
511 in the literature ([Cheng et al. 2024](#)) and based on our expertise.

512 The framework's design inherently supports the FAIR principles ([Wilkinson et al. 2016](#))  
513 for research data and software. The framework is **Findable** through public repositories  
514 (GitLab, Python Package Index). It is **Accessible** via open-source MIT licensing,  
515 enabling unrestricted use and modification. **Interoperability** is achieved through data  
516 harmonization that support multiple signal formats (open formats and proprietary vendor  
517 formats), channel naming conventions, and harmonized annotation semantics across  
518 diverse datasets. Finally, the framework ensures **Reusability** through its modular plugin  
519 architecture, versioned releases, extensive configuration options, and reproduction of  
520 existing methodologies. Adherence to the FAIR principles is a step towards more  
521 transparent and collaborative sleep research.

522 Our validation efforts yielded excellent results, confirming data access fidelity. Four  
523 studies (DRCNN ([Pourbabae et al. 2019](#)), SleepTransformer ([Phan et al. 2022](#)),  
524 SleepPPG-Net ([Kotzen et al. 2022](#)), and MSED ([Zahid et al. 2023](#))) achieved near-  
525 identical results using standardized data access compared to original custom  
526 implementations, validating the framework's data integrity. Importantly, these

527 reproductions now provide open-source alternatives to methods that were previously  
528 unavailable, advancing research transparency.

529 The DRCNN reproduction produced notably improved binary sleep classification results  
530 (AUPRC: 0.820→0.995). Since standardized data access is the primary change from the  
531 original implementation, this suggests the framework’s consistent preprocessing may  
532 enhance data quality, though the specific mechanisms require further investigation. We  
533 examined early validation results and found no anomalies suggesting the improvement  
534 is spurious.

535 The MSED study comprises three tasks: sleep arousal, sleep-disordered breathing  
536 (SDB), and leg movements. The reproduced SDB task showed an increase of around  
537 8%, while performance on the arousal task was slightly lower (-3.7%). During training,  
538 the optimal model weights were selected based on overall loss (the sum of losses for all  
539 tasks). Training logs indicate that arousal task performance peaked earlier in the  
540 validation set, potentially explaining the discrepancy between original reported values  
541 and our results.

542 Despite the training process and model architecture being open source, the replication  
543 of the NeuroNet study illustrates how standardized data access workflows can reveal  
544 documentation gaps in published research. The self-supervised learning (SSL) model  
545 produced slightly lower performance (-3%) than reported. As no detailed parameters  
546 were provided for data augmentation—a crucial component for SSL—we suspect  
547 incomplete method documentation rather than framework limitations. The standardized  
548 data loading provided by SleepPyPhases ensures the discrepancy stems from  
549 undocumented hyperparameters, not data access issues. This transparency benefit

550 demonstrates how workflow standardization can improve research reproducibility by  
551 isolating methodological ambiguities.

552 The NeuroNet reproduction highlights the value of open-source workflow  
553 implementations for scientific transparency. While the original study provided model  
554 architecture code, the lack of complete training configuration parameters prevented  
555 exact reproduction. By providing this open implementation through SleepPyPhases,  
556 future researchers gain access to both the data handling and a documented reference  
557 implementation, addressing gaps in the original publication. This represents a key  
558 contribution: converting proprietary or incompletely documented research into fully  
559 transparent, reproducible implementations.

560 Several design considerations emerged from the reproduction studies. The  
561 SleepTransformer reproduction required adapting intra-epoch validation to full epoch-  
562 based validation due to framework architecture, though this did not affect final results.  
563 The framework's TensorFlow 2.0+ requirements necessitated model conversions for  
564 some legacy implementations, highlighting version compatibility considerations when  
565 providing long-term data access infrastructure. These adaptations demonstrate the  
566 framework's flexibility while identifying areas where enhanced abstraction could improve  
567 methodological fidelity across diverse study designs.

568 The workflow framework provides efficient infrastructure for multi-dataset sleep  
569 research. The combination of optimized preprocessing storage and flexible data  
570 manipulation enables rapid iteration during method development. The configuration-  
571 based approach allows researchers to modify experimental parameters without code

572 changes, facilitating systematic exploration of data access patterns and preprocessing  
573 strategies.

574 The framework's ability to handle diverse datasets and preprocessing requirements  
575 through configuration alone significantly reduces the technical overhead typically  
576 associated with multi-dataset studies. This standardization enables researchers to focus  
577 on scientific questions rather than data infrastructure concerns, lowering barriers to entry  
578 for sleep research and enabling studies that would be impractical with custom data  
579 handling approaches.

580 Although the framework is primarily focused on sleep research, the principles are  
581 applicable to other physiological signal analysis domains. For example, similar  
582 harmonized data access patterns could support ECG analysis for arrhythmia detection  
583 or EEG analysis for seizure detection when appropriate dataset plugins are provided.

## 584 6. Conclusion

585 The *SleePyPhases* framework addresses critical challenges in sleep research by  
586 providing unified access to different sleep data repositories and custom PSG setups. It  
587 also provides a configuration-driven platform for data analysis and the development of  
588 machine learning pipelines. Our work demonstrates that standardization and  
589 harmonization of sleep data processing can be achieved without sacrificing  
590 methodological flexibility or algorithmic innovation. The integrated data harmonization  
591 proves particularly valuable for multi-dataset studies. Future development should focus  
592 on enhancing accessibility through improved documentation and tutorials, and  
593 expanding support for more intuitive extension points.

594 The successful reproduction of four published studies with near-identical results  
595 validates the framework's data integrity. Importantly, these reproductions now provide  
596 open-source implementations of methods that were previously unavailable, advancing  
597 research transparency and enabling community validation. The framework's memory-  
598 mapped storage system and efficient preprocessing pipeline significantly reduce  
599 technical overhead for multi-dataset studies while maintaining methodological flexibility.

600 *SleePyPhases* represents a step toward FAIR-compliant sleep research infrastructure.  
601 By providing standardized access to multiple data repositories, the framework reduces  
602 barriers to multi-dataset research and enables studies that would be impractical with  
603 custom data handling approaches. The open-source availability under the MIT license,  
604 combined with the modular plugin architecture, ensures that the community can extend  
605 support to new repositories and contribute improvements. While this implementation  
606 focuses on sleep research, the framework principles can be adapted to other  
607 physiological signal analysis domains requiring multi-repository access.

## 608 7. Code and Data Availability

609 All source code is made available under the MIT License on GitLab:

- 610 • **SleePyPhases Framework:** <https://gitlab.com/sleep-is-all-you-need/SleePyPhases> - Main framework implementation
- 612 • **Sleep Harmonizer:** <https://gitlab.com/sleep-is-all-you-need/sleep-harmonizer> -  
613 PSG data harmonization plugin
- 614 • **Reproduction Studies:** <https://gitlab.com/sleep-is-all-you-need/reproduce> - All  
615 reproduction experiments as sub-projects

- 616 • **pyPhases Core:** <https://gitlab.com/sleep-is-all-you-need/pyphases> - Core  
617 pyPhases framework and all related projects including pyPhasesRecordLoader  
618 and dataset-specific record loaders (SHHS, MESA, MrOS, etc.)

619 The SHHS, MESA and MrOS datasets for validating the framework are available from  
620 the National Sleep Research Resource website (<https://sleepdata.org/datasets>), while  
621 the PhysioNet 2018 and Sleep-EDF datasets are available from Physionet  
622 (<https://physionet.org/>).

## 623 8. Funding

624 This research was funded by the the Federal Ministry of Research, Technology and  
625 Space under the funding code 01ZZ2324F.

## 626 9. Acknowledgements

627 The authors gratefully acknowledge the computing time made available to them on the  
628 high-performance computer at the NHR Center of TU Dresden. This center is jointly  
629 supported by the Federal Ministry of Education and Research and the state  
630 governments participating in the NHR ([www.nhr-verein.de/unsere-partner](http://www.nhr-verein.de/unsere-partner)).

## 631 10. References

- 632 Arnardottir, Erna S, Johan Verbraecken, Marta Gonçalves, Michaela D Gjerstad, Ludger  
633 Grote, Francisco Javier Puertas, Stefan Mihaicuta, et al. 2016. "Variability in Recording  
634 and Scoring of Respiratory Events During Sleep in Europe: A Need for Uniform  
635 Standards." *Journal of Sleep Research* 25 (2): 144–57.
- 636 Berry, Richard B, Rita Brooks, Charlene E Gamaldo, Susan M Harding, C Marcus,  
637 Bradley V Vaughn, et al. 2012. "The AASM Manual for the Scoring of Sleep and  
638 Associated Events." *Rules, Terminology and Technical Specifications, Darien, Illinois,*  
639 *American Academy of Sleep Medicine* 176: 2012.

- 640 Blackwell, Terri, Kristine Yaffe, Sonia Ancoli-Israel, Susan Redline, Kristine E Ensrud,  
641 Marcia L Stefanick, Alison Laffan, Katie L Stone, and Osteoporotic Fractures in Men  
642 Study Group. 2011. "Associations Between Sleep Architecture and Sleep-Disordered  
643 Breathing and Cognition in Older Community-Dwelling Men: The Osteoporotic Fractures  
644 in Men Sleep Study." *Journal of the American Geriatrics Society* 59 (12): 2217–25.
- 645 Chen, Xiaoli, Rui Wang, Phyllis Zee, Pamela L Lutsey, Sogol Javaheri, Carmela  
646 Alcántara, Chandra L Jackson, Michelle A Williams, and Susan Redline. 2015.  
647 "Racial/Ethnic Differences in Sleep Disturbances: The Multi-Ethnic Study of  
648 Atherosclerosis (MESA)." *Sleep* 38 (6): 877–88.
- 649 Cheng, Cindy, Luca Messerschmidt, Isaac Bravo, Marco Waldbauer, Rohan Bhavikatti,  
650 Caress Schenk, Vanja Grujic, Tim Model, Robert Kubinec, and Joan Barceló. 2024. "A  
651 General Primer for Data Harmonization." *Scientific Data* 11 (1): 152.
- 652 Ehrlich, Franz, Johannes Bender, Hagen Malberg, and Miriam Goldammer. 2022.  
653 "Automatic Sleep Arousal Detection Using Heart Rate from a Single-Lead  
654 Electrocardiogram." In *2022 Computing in Cardiology (CinC)*, 498:1–4. IEEE.
- 655 Ehrlich, Franz, Tony Sehr, Moritz Brandt, Martin Schmidt, Hagen Malberg, Martin  
656 Sedlmayr, and Miriam Goldammer. 2024. "State-of-the-Art Sleep Arousal Detection  
657 Evaluated on a Comprehensive Clinical Dataset." *Scientific Reports* 14 (1): 16239.
- 658 Fiorillo, Luigi, Giuliana Monachino, Michal Bechny, and Francesca Faraci. 2024.  
659 "SleePyLand: A Python Library to Analyse the Large Amount of NSRR Sleep Data via  
660 Deep Learning Algorithms." In *JOURNAL OF SLEEP RESEARCH*. Vol. 33. WILEY 111  
661 RIVER ST, HOBOKEN 07030-5774, NJ USA.
- 662 Ghassemi, Mohammad M, Benjamin E Moody, Li-Wei H Lehman, Christopher Song,  
663 Qiao Li, Haoqi Sun, Roger G Mark, M Brandon Westover, and Gari D Clifford. 2018.  
664 "You Snooze, You Win: The Physionet/Computing in Cardiology Challenge 2018." In  
665 *2018 Computing in Cardiology Conference (CinC)*, 45:1–4. IEEE.
- 666 Goldammer, Miriam, Sebastian Zaunseder, Franz Ehrlich, and Hagen Malberg. 2022.  
667 "Comparison of Signal Combinations for Cardiorespiratory Sleep Staging." In *2022*  
668 *Computing in Cardiology (CinC)*, 498:1–4. IEEE.
- 669 Howe-Patterson, Matthew, Bahareh Pournabae, and Frederic Benard. 2018.  
670 "Automated Detection of Sleep Arousals from Polysomnography Data Using a Dense  
671 Convolutional Neural Network." In *2018 Computing in Cardiology Conference (CinC)*,  
672 45:1–4. IEEE.
- 673 Kemp, Bob, and Jesus Olivan. 2003. "European Data Format 'Plus'(EDF+), an EDF  
674 Alike Standard Format for the Exchange of Physiological Data." *Clinical*  
675 *Neurophysiology* 114 (9): 1755–61.
- 676 Kemp, Bob, Aeilko H Zwinderman, Bert Tuk, Hilbert AC Kamphuisen, and Josefien JL  
677 Obery. 2000. "Analysis of a Sleep-Dependent Neuronal Feedback Loop: The Slow-  
678 Wave Microcontinuity of the EEG." *IEEE Transactions on Biomedical Engineering* 47 (9):  
679 1185–94.

- 680 Khalighi, Sirvan, Teresa Sousa, José Moutinho Santos, and Urbano Nunes. 2016.  
681 “ISRUC-Sleep: A Comprehensive Public Dataset for Sleep Researchers.” *Computer*  
682 *Methods and Programs in Biomedicine* 124: 180–92.
- 683 Kotzen, Kevin, Peter H Charlton, Sharon Salabi, Lea Amar, Amir Landesberg, and  
684 Joachim A Behar. 2022. “SleepPPG-Net: A Deep Learning Algorithm for Robust Sleep  
685 Staging from Continuous Photoplethysmography.” *IEEE Journal of Biomedical and*  
686 *Health Informatics* 27 (2): 924–32.
- 687 Lee, Cheol-Hui, Hakseung Kim, Hyun-jeong Han, Min-Kyung Jung, Byung C Yoon, and  
688 Dong-Joo Kim. 2024. “NeuroNet: A Novel Hybrid Self-Supervised Learning Framework  
689 for Sleep Stage Classification Using Single-Channel EEG.” *arXiv Preprint*  
690 *arXiv:2404.17585*.
- 691 Mazzotti, Diego R, Melissa A Haendel, Julie A McMurry, Connor J Smith, Daniel J  
692 Buysse, Till Roenneberg, Thomas Penzel, et al. 2022. “Sleep and circadian informatics  
693 data harmonization: a workshop report from the Sleep Research Society and Sleep  
694 Research Network.” *Sleep* 45 (6): zsac002. <https://doi.org/10.1093/sleep/zsac002>.
- 695 Mukherjee, Sutapa, Sanjay R Patel, Stefanos N Kales, Najib T Ayas, Kingman P Strohl,  
696 David Gozal, and Atul Malhotra. 2015. “An Official American Thoracic Society  
697 Statement: The Importance of Healthy Sleep. Recommendations and Future Priorities.”  
698 *American Journal of Respiratory and Critical Care Medicine* 191 (12): 1450–58.
- 699 Perslev, Mathias, Sune Darkner, Lykke Kempfner, Miki Nikolic, Poul Jørgen Jennum,  
700 and Christian Igel. 2021. “U-Sleep: Resilient High-Frequency Sleep Staging.” *NPJ Digital*  
701 *Medicine* 4 (1): 72.
- 702 Phan, Huy, Kaare Mikkelsen, Oliver Y Chén, Philipp Koch, Alfred Mertins, and Maarten  
703 De Vos. 2022. “Sleeptransformer: Automatic Sleep Staging with Interpretability and  
704 Uncertainty Quantification.” *IEEE Transactions on Biomedical Engineering* 69 (8): 2456–  
705 67.
- 706 Pourbabae, Bahareh, MH Patterson, MR Patterson, and Frederic Benard. 2019.  
707 “SleepNet: Automated Sleep Analysis via Dense Convolutional Neural Network Using  
708 Physiological Time Series.” *Physiological Measurement* 40 (8): 084005.
- 709 Quan, Stuart F, Barbara V Howard, Conrad Iber, James P Kiley, F Javier Nieto, George  
710 T O’Connor, David M Rapoport, et al. 1997. “The Sleep Heart Health Study: Design,  
711 Rationale, and Methods.” *Sleep* 20 (12): 1077–85.
- 712 Redline, Susan, and Shaun M Purcell. 2021. “Sleep and Big Data: Harnessing Data,  
713 Technology, and Analytics for Monitoring Sleep and Improving Diagnostics, Prediction,  
714 and Interventions—an Era for Sleep-Omics?” *Sleep*. Oxford University Press US.
- 715 Strøm, Jesper, Andreas Larsen Engholm, Kristian Peter Lorenzen, and Kaare B  
716 Mikkelsen. 2024. “Common Sleep Data Pipeline for Combined Data Sets.” *Plos One* 19  
717 (8): e0307202.

- 718 Sveinbjarnarson, Bjarki Freyr, Lisa Schmitz, Erna Sif Arnardottir, and Anna Sigridur  
719 Islind. 2023. “The Sleep Revolution Platform: A Dynamic Data Source Pipeline and  
720 Digital Platform Architecture for Complex Sleep Data.” *Current Sleep Medicine Reports*  
721 9 (2): 91–100.
- 722 Westover, M. B., V. Moura Junior, R. Thomas, S. Cash, S. Nasiri, H. Sun, A. Gupta, et  
723 al. 2023. “The Human Sleep Project (Version 2.0).” Brain Data Science Platform.  
724 <https://doi.org/10.60508/qjbv-hg78>.
- 725 Wilkinson, Mark D, Michel Dumontier, IJsbrand Jan Aalbersberg, Gabrielle Appleton,  
726 Myles Axton, Arie Baak, Niklas Blomberg, et al. 2016. “The FAIR Guiding Principles for  
727 Scientific Data Management and Stewardship.” *Scientific Data* 3 (1): 1–9.
- 728 Zahid, Alexander Neergaard, Poul Jennum, Emmanuel Mignot, and Helge BD Sorensen.  
729 2023. “MSed: A Multi-Modal Sleep Event Detection Model for Clinical Sleep Analysis.”  
730 *IEEE Transactions on Biomedical Engineering*.
- 731 Zhang, Guo-Qiang, Licong Cui, Remo Mueller, Shiqiang Tao, Matthew Kim, Michael  
732 Rueschman, Sara Mariani, Daniel Mobley, and Susan Redline. 2018. “The National  
733 Sleep Research Resource: Towards a Sleep Data Commons.” *Journal of the American*  
734 *Medical Informatics Association* 25 (10): 1351–58.

## 735 11. Appendix

*Listing 11: Example Configuration for a basic pyPhases project*

```
name: HelloWorld

exporter:
  # PickleExporter can handle primitive types
  - PickleExporter

phases:
  - name: GenerateIt
    exports:
      - sentence
  - name: SayIt

data:
  - name: sentence
    dependsOn:
      - who

config:
  who: world
```

736

*Listing 12: Example phase to generate data for the basic pyPhases project*

```
from pyPhases import Phase

class GenerateIt(Phase):
    """This phase generates the sentence to be said."""

    def main(self):
        self.log("Generating the sentence")
        greetWho = self.getConfig("who")
        self.registerData("sentence", f"Hello {greetWho}!")
```

737

*Listing 13: Example phase to load data for the basic pyPhases project*

```
### `HelloWorld/phases/SayIt.py`

from pyPhases import Phase

class SayIt(Phase):
    """This phase says the sentence."""

    def main(self):
        sentence = self.getData("sentence", str)
        self.logSuccess(sentence)
```

738
